# Supplementary material for: 3-Aryl β-carbolin-1-ones as a new class of potent inhibitors of tumor cell proliferation: synthesis and biological evaluation
Source: Royal Society of Chemistry journal article supplement (doi:10.1039/b412921k), 2005-01-01
Supplement: b412921k.pdf [file b412921k.pdf]

| CIF Data Item                                                                                                                                                                                                                                                   | Description                                                                                                                                                                                                                                                                                                                                                                                                        |
|-----------------------------------------------------------------------------------------------------------------------------------------------------------------------------------------------------------------------------------------------------------------|--------------------------------------------------------------------------------------------------------------------------------------------------------------------------------------------------------------------------------------------------------------------------------------------------------------------------------------------------------------------------------------------------------------------|
| _publ_contact_author_name<br>_publ_contact_author_address                                                                                                                                                                                                       | Yuefei Hu, Department of Chemistry, Tsinghua University, Beijing 100084, P. R. China.                                                                                                                                                                                                                                                                                                                              |
| _publ_requested_journal                                                                                                                                                                                                                                         | Org. Biomol. Chem.                                                                                                                                                                                                                                                                                                                                                                                                 |
| _publ_section_title                                                                                                                                                                                                                                             | <b>3-Aryl-Carbolin-1-Ones as A New Class of Potent Inhibitors of Tumor Cell Proliferation: Synthesis and Biological Evaluation</b>                                                                                                                                                                                                                                                                                 |
| _publ_section_exptl_refinement<br>_computing_data_collection<br>_computing_cell_refinement<br>_computing_data_reduction<br>_computing_structure_solution<br>_computing_structure_refinement<br>_computing_molecular_graphics<br>_computing_publication_material | _computing_data_collection 'Bruker SMART'<br>_computing_cell_refinement 'Bruker SMART'<br>_computing_data_reduction 'Bruker SHELXTL'<br>_computing_structure_solution 'SHELXS-97 (Sheldrick, 1990)'<br>_computing_structure_refinement 'SHELXL-97 (Sheldrick, 1997)'<br>_computing_molecular_graphics 'ORTEP-3 for Windows V1.05(Farrugia, 1999)'<br>_computing_publication_material 'SHELXL-97 (Sheldrick, 1997)' |
| _chemical_formula_sum                                                                                                                                                                                                                                           | C <sub>19</sub> H <sub>15</sub> N <sub>2</sub> O <sub>3</sub> , C <sub>4</sub> H <sub>4</sub> O                                                                                                                                                                                                                                                                                                                    |
| _chemical_formula_weight                                                                                                                                                                                                                                        | 351.37                                                                                                                                                                                                                                                                                                                                                                                                             |
| _symmetry_cell_setting                                                                                                                                                                                                                                          | Monoclinic                                                                                                                                                                                                                                                                                                                                                                                                         |
| _symmetry_space_group_name_H-M                                                                                                                                                                                                                                  | P21/n                                                                                                                                                                                                                                                                                                                                                                                                              |

|                                                                                                                  |                                                                                                                                                                                                                                 |
|------------------------------------------------------------------------------------------------------------------|---------------------------------------------------------------------------------------------------------------------------------------------------------------------------------------------------------------------------------|
| _symmetry_equiv_pos_as_xyz                                                                                       | 'x, y, z'<br>'-x+1/2, y+1/2, -z+1/2'<br>'-x, -y, -z'<br>'x-1/2, -y-1/2, z-1/2'                                                                                                                                                  |
| _cell_length_a<br>_cell_length_b<br>_cell_length_c<br>_cell_angle_alpha<br>_cell_angle_beta<br>_cell_angle_gamma | _cell_length_a            9.2371(6)<br>_cell_length_b            7.4210(5)<br>_cell_length_c            25.1558(17)<br>_cell_angle_alpha        90.00<br>_cell_angle_beta         96.0020(10)<br>_cell_angle_gamma        90.00 |
| _cell_volume                                                                                                     | 1714.9(2)                                                                                                                                                                                                                       |
| _cell_formula_units_Z                                                                                            | 4                                                                                                                                                                                                                               |
| _exptl_crystal_density_diffn                                                                                     | 1.361                                                                                                                                                                                                                           |
| _diffn_radiation_type                                                                                            | MoK $\alpha$                                                                                                                                                                                                                    |
| _diffn_radiation_wavelength                                                                                      | 0.71073                                                                                                                                                                                                                         |
| _cell_measurement_reflns_used                                                                                    |                                                                                                                                                                                                                                 |
| _cell_measurement_theta_min<br>_cell_measurement_theta_max                                                       |                                                                                                                                                                                                                                 |
| _diffn_ambient_temperature                                                                                       | 293(2)                                                                                                                                                                                                                          |
| _exptl_cryst_F_000                                                                                               | 740                                                                                                                                                                                                                             |
| _exptl_absorpt_coefficient_mu                                                                                    | 0.096                                                                                                                                                                                                                           |
| _exptl_crystal_description                                                                                       | prismatic                                                                                                                                                                                                                       |
| _exptl_crystal_size_max<br>_exptl_crystal_size_mid<br>_exptl_crystal_size_min<br>_exptl_crystal_size_rad         | _exptl_crystal_size_max        1.10<br>_exptl_crystal_size_mid        0.75<br>_exptl_crystal_size_min        0.65                                                                                                               |

|                                                                                                                                                                            |                                                                                                                                                                                                                             |
|----------------------------------------------------------------------------------------------------------------------------------------------------------------------------|-----------------------------------------------------------------------------------------------------------------------------------------------------------------------------------------------------------------------------|
| _exptl_crystal_colour                                                                                                                                                      | colorless                                                                                                                                                                                                                   |
| _diffn_measurement_device_type<br>_diffn_measurement_device (old)                                                                                                          | CCD area detector                                                                                                                                                                                                           |
| _diffn_measurement_method                                                                                                                                                  | phi and omega scans                                                                                                                                                                                                         |
| _exptl_absorpt_correction_type<br>_exptl_absorpt_correction_T_min<br>_exptl_absorpt_correction_T_max                                                                       | multiscans<br>0.9019<br>0.9403                                                                                                                                                                                              |
| _diffn_radiation_monochromator                                                                                                                                             | graphite                                                                                                                                                                                                                    |
| _diffn_reflns_number                                                                                                                                                       | 10057                                                                                                                                                                                                                       |
| _reflns_number_total                                                                                                                                                       | 3970                                                                                                                                                                                                                        |
| _diffn_reflns_theta_max                                                                                                                                                    | 28.24                                                                                                                                                                                                                       |
| _diffn_reflns_av_R_equivalents                                                                                                                                             | 0.0438                                                                                                                                                                                                                      |
| _diffn_reflns_limit_h_min<br>_diffn_reflns_limit_h_max<br>_diffn_reflns_limit_k_min<br>_diffn_reflns_limit_k_max<br>_diffn_reflns_limit_l_min<br>_diffn_reflns_limit_l_max | _diffn_reflns_limit_h_min      -12<br>_diffn_reflns_limit_h_max      11<br>_diffn_reflns_limit_k_min      -9<br>_diffn_reflns_limit_k_max      8<br>_diffn_reflns_limit_l_min      -31<br>_diffn_reflns_limit_l_max      32 |
| _refine_ls_structure_factor_coef                                                                                                                                           | Fsqd                                                                                                                                                                                                                        |
| _refine_ls_R_factor_gt<br>_refine_ls_R_factor_obs (old)                                                                                                                    | 0.0646                                                                                                                                                                                                                      |
| _refine_ls_wR_factor_ref<br>_refine_ls_wR_factor_obs (old)                                                                                                                 | 0.2036                                                                                                                                                                                                                      |
| _refine_ls_goodness_of_fit_ref<br>_refine_ls_goodness_of_fit_obs(old)                                                                                                      | 1.081                                                                                                                                                                                                                       |
| _refine_ls_number_reflns<br>_refine_ls_number_parameters                                                                                                                   | _refine_ls_number_reflns      3970<br>_refine_ls_number_parameters      235                                                                                                                                                 |
| _refine_ls_weighting_scheme                                                                                                                                                | calc                                                                                                                                                                                                                        |

|                                                                                                       |                                                                                                                                                                                                                                                                                                                                                                                                                                          |
|-------------------------------------------------------------------------------------------------------|------------------------------------------------------------------------------------------------------------------------------------------------------------------------------------------------------------------------------------------------------------------------------------------------------------------------------------------------------------------------------------------------------------------------------------------|
| _refine_ls_hydrogen_treatment                                                                         | mixed                                                                                                                                                                                                                                                                                                                                                                                                                                    |
| _refine_ls_shift/su_max<br>_refine_ls_shift/esd_max(old)                                              | 0.001                                                                                                                                                                                                                                                                                                                                                                                                                                    |
| _refine_diff_density_max<br>_refine_diff_density_min                                                  | 0.842<br>-0.776                                                                                                                                                                                                                                                                                                                                                                                                                          |
| _refine_ls_abs_structure_details<br>_refine_ls_abs_structure_Flack<br>_refine_ls_abs_structure_Rogers |                                                                                                                                                                                                                                                                                                                                                                                                                                          |
| _atoms_sites_solution_primary                                                                         | direct                                                                                                                                                                                                                                                                                                                                                                                                                                   |
| _atoms_sites_solution_secondary                                                                       | difmap                                                                                                                                                                                                                                                                                                                                                                                                                                   |
| _atom_site_label                                                                                      |                                                                                                                                                                                                                                                                                                                                                                                                                                          |
| _atom_site_fract_x<br>_atom_site_fract_y<br>_atom_site_fract_z                                        | _atom_site_label<br>_atom_site_type_symbol<br>_atom_site_fract_x<br>_atom_site_fract_y<br>_atom_site_fract_z<br>_atom_site_U_iso_or_equiv<br>_atom_site_adp_type<br>_atom_site_occupancy<br>_atom_site_calc_flag<br>_atom_site_refinement_flags<br>_atom_site_disorder_assembly<br>_atom_site_disorder_group<br><br>N1 N 0.79422(18) 0.6265(2) 1.01201(6)<br>0.0328(4) Uani 1 d . . .<br><br>H1 H 0.8749 0.5897 1.0286 0.039 Uiso 1 calc |

R . .

N2 N 0.80485(18) 0.6791(2) 0.86855(7)  
0.0345(4) Uani 1 d . . .

H2 H 0.8605 0.6695 0.8433 0.041 Uiso 1 calc  
R . .

O1 O 0.46221(18) 0.6977(2) 1.15081(6)  
0.0478(4) Uani 1 d . . .

O2 O 0.26509(18) 0.8038(2) 1.07916(6)  
0.0474(4) Uani 1 d . . .

O3 O 0.99535(15) 0.5853(2) 0.92696(6)  
0.0406(4) Uani 1 d . . .

O4 O 0.1804(3) 0.7439(4) 0.86100(11)  
0.0894(8) Uiso 1 d . . .

H4 H 0.2312 0.7191 0.8887 0.107 Uiso 1 calc  
R . .

C1 C 0.6687(2) 0.6666(3) 1.03481(8)  
0.0307(4) Uani 1 d . . .

C2 C 0.6414(2) 0.6549(3) 1.08844(8)  
0.0348(5) Uani 1 d . . .

H2A H 0.7128 0.6159 1.1147 0.042 Uiso 1  
calc R . .

C3 C 0.5055(2) 0.7029(3) 1.10076(8)  
0.0347(5) Uani 1 d . . .

C4 C 0.3952(2) 0.7628(3) 1.06072(8)  
0.0350(5) Uani 1 d . . .

C5 C 0.4231(2) 0.7746(3) 1.00836(8)  
0.0341(5) Uani 1 d . . .

C6 C 0.5614(2) 0.7254(3) 0.99503(8)  
0.0308(4) Uani 1 d . . .

C7 C 0.6255(2) 0.7181(3) 0.94581(7)

0.0298(4) Uani 1 d . . .

C8 C 0.5727(2) 0.7581(3) 0.89212(8)  
0.0332(5) Uani 1 d . . .

H8 H 0.4776 0.7977 0.8834 0.040 Uiso 1 calc  
R . .

C9 C 0.6644(2) 0.7373(3) 0.85399(8)  
0.0324(5) Uani 1 d . . .

C10 C 0.8649(2) 0.6350(3) 0.91901(8)  
0.0314(4) Uani 1 d . . .

C11 C 0.7672(2) 0.6558(3) 0.95811(8)  
0.0302(4) Uani 1 d . . .

C12 C 0.6225(2) 0.7696(3) 0.79631(8)  
0.0333(5) Uani 1 d . . .

C13 C 0.6917(3) 0.6817(3) 0.75699(8)  
0.0407(5) Uani 1 d . . .

H13 H 0.7674 0.6020 0.7670 0.049 Uiso 1  
calc R . .

C14 C 0.6494(3) 0.7115(3) 0.70343(9)  
0.0466(6) Uani 1 d . . .

H14 H 0.6978 0.6539 0.6776 0.056 Uiso 1  
calc R . .

C15 C 0.5357(3) 0.8263(4) 0.68834(9)  
0.0473(6) Uani 1 d . . .

H15 H 0.5059 0.8445 0.6523 0.057 Uiso 1  
calc R . .

C16 C 0.4663(3) 0.9140(4) 0.72631(9)  
0.0485(6) Uani 1 d . . .

H16 H 0.3895 0.9916 0.7160 0.058 Uiso 1  
calc R . .

C17 C 0.5104(2) 0.8871(3) 0.78021(9)

|                           |                                                                                                                                                                                                                                                                                                                                                                                                                                                                                                                                                                                                                                                                                                                                                                                                                                                                                                                    |
|---------------------------|--------------------------------------------------------------------------------------------------------------------------------------------------------------------------------------------------------------------------------------------------------------------------------------------------------------------------------------------------------------------------------------------------------------------------------------------------------------------------------------------------------------------------------------------------------------------------------------------------------------------------------------------------------------------------------------------------------------------------------------------------------------------------------------------------------------------------------------------------------------------------------------------------------------------|
|                           | <p>0.0422(5) Uani 1 d . . .</p> <p>H17 H 0.4639 0.9488 0.8058 0.051 Uiso 1<br/>calc R . .</p> <p>C18 C 0.5665(3) 0.6393(4) 1.19286(9)<br/>0.0507(6) Uani 1 d . . .</p> <p>H18A H 0.5987 0.5200 1.1853 0.076 Uiso 1<br/>calc R . .</p> <p>H18B H 0.5230 0.6386 1.2259 0.076 Uiso 1<br/>calc R . .</p> <p>H18C H 0.6482 0.7200 1.1958 0.076 Uiso 1<br/>calc R . .</p> <p>C19 C 0.1516(3) 0.8607(4) 1.04075(10)<br/>0.0498(6) Uani 1 d . . .</p> <p>H19A H 0.1808 0.9683 1.0235 0.075 Uiso 1<br/>calc R . .</p> <p>H19B H 0.0659 0.8848 1.0581 0.075 Uiso 1<br/>calc R . .</p> <p>H19C H 0.1311 0.7676 1.0145 0.075 Uiso 1<br/>calc R . .</p> <p>C20 C 0.1540(4) 0.9232(5) 0.85933(17)<br/>0.0911(12) Uani 1 d . . .</p> <p>H20A H 0.0538 0.9447 0.8643 0.137 Uiso 1<br/>calc R . .</p> <p>H20B H 0.1738 0.9700 0.8253 0.137 Uiso 1<br/>calc R . .</p> <p>H20C H 0.2155 0.9820 0.8872 0.137 Uiso 1<br/>calc R . .</p> |
| _atom_site_U_iso_or_equiv |                                                                                                                                                                                                                                                                                                                                                                                                                                                                                                                                                                                                                                                                                                                                                                                                                                                                                                                    |
| _atom_site_aniso_label    |                                                                                                                                                                                                                                                                                                                                                                                                                                                                                                                                                                                                                                                                                                                                                                                                                                                                                                                    |

|                                                                                                                                                                               |                                                                                                                                                                                                             |
|-------------------------------------------------------------------------------------------------------------------------------------------------------------------------------|-------------------------------------------------------------------------------------------------------------------------------------------------------------------------------------------------------------|
|                                                                                                                                                                               | <p>_atom_site_aniso_label</p> <p>_atom_site_aniso_U_11</p> <p>_atom_site_aniso_U_22</p> <p>_atom_site_aniso_U_33</p> <p>_atom_site_aniso_U_23</p> <p>_atom_site_aniso_U_13</p> <p>_atom_site_aniso_U_12</p> |
|                                                                                                                                                                               | <p>N1 0.0275(8) 0.0460(10) 0.0246(8)<br/>0.0012(7) 0.0017(6) 0.0030(7)</p>                                                                                                                                  |
|                                                                                                                                                                               | <p>N2 0.0302(9) 0.0492(10) 0.0249(8)<br/>0.0015(7) 0.0062(6) 0.0042(7)</p>                                                                                                                                  |
|                                                                                                                                                                               | <p>O1 0.0451(9) 0.0730(12) 0.0269(8)<br/>-0.0006(7) 0.0111(6) 0.0047(8)</p>                                                                                                                                 |
|                                                                                                                                                                               | <p>O2 0.0360(9) 0.0706(11) 0.0375(9)<br/>-0.0034(8) 0.0124(7) 0.0071(8)</p>                                                                                                                                 |
|                                                                                                                                                                               | <p>O3 0.0285(7) 0.0633(10) 0.0300(8)<br/>0.0047(7) 0.0029(6) 0.0075(7)</p>                                                                                                                                  |
|                                                                                                                                                                               | <p>C1 0.0301(10) 0.0355(10) 0.0269(10)<br/>-0.0021(8) 0.0047(7) -0.0013(8)</p>                                                                                                                              |
|                                                                                                                                                                               | <p>C2 0.0353(11) 0.0435(11) 0.0253(9)<br/>-0.0003(8) 0.0014(8) -0.0001(9)</p>                                                                                                                               |
|                                                                                                                                                                               | <p>C3 0.0384(11) 0.0414(11) 0.0251(9)<br/>-0.0023(8) 0.0065(8) -0.0027(9)</p>                                                                                                                               |
|                                                                                                                                                                               | <p>C4 0.0319(10) 0.0407(11) 0.0335(10)<br/>-0.0042(8) 0.0084(8) 0.0004(8)</p>                                                                                                                               |
|                                                                                                                                                                               | <p>C5 0.0325(10) 0.0396(11) 0.0303(10)</p>                                                                                                                                                                  |
| <p>_atom_site_aniso_U_11</p> <p>_atom_site_aniso_U_22</p> <p>_atom_site_aniso_U_33</p> <p>_atom_site_aniso_U_12</p> <p>_atom_site_aniso_U_13</p> <p>_atom_site_aniso_U_23</p> |                                                                                                                                                                                                             |



-0.0009(8) 0.0045(8) 0.0015(8)

C6 0.0311(10) 0.0347(10) 0.0270(9)  
0.0003(7) 0.0048(8) -0.0009(8)

C7 0.0295(10) 0.0343(10) 0.0261(9)  
0.0002(7) 0.0048(7) 0.0003(8)

C8 0.0307(10) 0.0403(11) 0.0283(10)  
0.0032(8) 0.0019(8) 0.0058(8)

C9 0.0321(10) 0.0379(10) 0.0265(10)  
0.0021(8) 0.0001(8) 0.0014(8)

C10 0.0296(10) 0.0389(10) 0.0259(9)  
0.0001(8) 0.0032(7) 0.0006(8)

C11 0.0306(10) 0.0348(10) 0.0250(9)  
0.0000(7) 0.0021(7) -0.0003(8)

C12 0.0322(10) 0.0428(11) 0.0247(9)  
0.0052(8) 0.0016(8) -0.0010(8)

C13 0.0408(12) 0.0527(13) 0.0288(10)  
0.0040(9) 0.0050(9) 0.0058(10)

C14 0.0507(14) 0.0614(15) 0.0281(11)  
-0.0001(10) 0.0059(9) -0.0046(11)

C15 0.0498(14) 0.0609(15) 0.0288(11)  
0.0115(10) -0.0069(9) -0.0126(11)

C16 0.0428(13) 0.0573(14) 0.0426(13)  
0.0153(11) -0.0093(10) 0.0015(11)

C17 0.0404(12) 0.0504(13) 0.0359(11)  
0.0058(9) 0.0039(9) 0.0065(10)

C18 0.0569(15) 0.0682(16) 0.0275(11)  
0.0042(10) 0.0069(10) -0.0012(12)

C19 0.0353(12) 0.0626(15) 0.0525(14)  
-0.0067(12) 0.0096(10) 0.0083(11)

C20 0.082(2) 0.061(2) 0.134(4) 0.019(2)

|                                                                                                                                                                                                                                                                                                                                                                                                                                                                                                                                                                                                   |                                                                                       |
|---------------------------------------------------------------------------------------------------------------------------------------------------------------------------------------------------------------------------------------------------------------------------------------------------------------------------------------------------------------------------------------------------------------------------------------------------------------------------------------------------------------------------------------------------------------------------------------------------|---------------------------------------------------------------------------------------|
|                                                                                                                                                                                                                                                                                                                                                                                                                                                                                                                                                                                                   | 0.034(2) 0.0091(18)                                                                   |
| <p> <u>_geom_bond_atom_site_label_1</u><br/> <u>_geom_bond_atom_site_label_2</u><br/> <u>_geom_bond_distance</u><br/> <u>_geom_bond_site_symmetry_2</u><br/> <u>_geom_bond_publ_flag</u> </p> <p> N1 C11 1.370(2) . ?<br/> N1 C1 1.378(2) . ?<br/> N1 H1 0.8600 . ?<br/> N2 C10 1.371(2) . ?<br/> N2 C9 1.380(3) . ?<br/> N2 H2 0.8600 . ?<br/> O1 C3 1.361(2) . ?<br/> O1 C18 1.422(3) . ?<br/> O2 C4 1.367(2) . ?<br/> O2 C19 1.414(3) . ?<br/> O3 C10 1.256(2) . ?<br/> O4 C20 1.352(4) . ?<br/> O4 H4 0.8200 . ?<br/> C1 C2 1.401(3) . ?<br/> C1 C6 1.403(3) . ?<br/> C2 C3 1.371(3) . ? </p> | <p> <u>_geom_bond_atom_site_label_1</u><br/> <u>_geom_bond_atom_site_label_2</u> </p> |

C2 H2A 0.9300 . ?

C3 C4 1.427(3) . ?

C4 C5 1.371(3) . ?

C5 C6 1.402(3) . ?

C6 C7 1.428(3) . ?

C7 C11 1.392(3) . ?

C7 C8 1.419(3) . ?

C8 C9 1.353(3) . ?

C8 H8 0.9300 . ?

C9 C12 1.482(3) . ?

C10 C11 1.411(3) . ?

C12 C17 1.381(3) . ?

C12 C13 1.395(3) . ?

C13 C14 1.381(3) . ?

C13 H13 0.9300 . ?

C14 C15 1.375(4) . ?

C14 H14 0.9300 . ?

C15 C16 1.369(4) . ?

C15 H15 0.9300 . ?

C16 C17 1.389(3) . ?

C16 H16 0.9300 . ?

C17 H17 0.9300 . ?

C18 H18A 0.9599 . ?

|                                                                                                                                                                                                                                                                                       |                                                                                                                                                                                                                                                                                                                                                                                                                                                             |
|---------------------------------------------------------------------------------------------------------------------------------------------------------------------------------------------------------------------------------------------------------------------------------------|-------------------------------------------------------------------------------------------------------------------------------------------------------------------------------------------------------------------------------------------------------------------------------------------------------------------------------------------------------------------------------------------------------------------------------------------------------------|
|                                                                                                                                                                                                                                                                                       | <p>C18 H18B 0.9599 . ?</p> <p>C18 H18C 0.9599 . ?</p> <p>C19 H19A 0.9599 . ?</p> <p>C19 H19B 0.9599 . ?</p> <p>C19 H19C 0.9599 . ?</p> <p>C20 H20A 0.9599 . ?</p> <p>C20 H20B 0.9599 . ?</p> <p>C20 H20C 0.9599 . ?</p>                                                                                                                                                                                                                                     |
| <u>_geom_bond_distance</u>                                                                                                                                                                                                                                                            |                                                                                                                                                                                                                                                                                                                                                                                                                                                             |
| <p><u>_geom_angle_atom_site_label_1</u></p> <p><u>_geom_angle_atom_site_label_2</u></p> <p><u>_geom_angle_atom_site_label_3</u></p> <p><u>_geom_angle</u></p> <p><u>_geom_angle_site_symmetry_1</u></p> <p><u>_geom_angle_site_symmetry_3</u></p> <p><u>_geom_angle_publ_flag</u></p> | <p>geom_angle_atom_site_label_1</p> <p>_geom_angle_atom_site_label_2</p> <p>_geom_angle_atom_site_label_3</p> <p>_geom_angle</p> <p>_geom_angle_site_symmetry_1</p> <p>_geom_angle_site_symmetry_3</p> <p>_geom_angle_publ_flag</p> <p>C11 N1 C1 107.66(16) . . ?</p> <p>C11 N1 H1 126.2 . . ?</p> <p>C1 N1 H1 126.2 . . ?</p> <p>C10 N2 C9 126.77(17) . . ?</p> <p>C10 N2 H2 116.6 . . ?</p> <p>C9 N2 H2 116.6 . . ?</p> <p>C3 O1 C18 117.08(18) . . ?</p> |

C4 O2 C19 116.73(18) . . ?

C20 O4 H4 109.5 . . ?

N1 C1 C2 129.17(18) . . ?

N1 C1 C6 109.44(16) . . ?

C2 C1 C6 121.39(18) . . ?

C3 C2 C1 117.60(19) . . ?

C3 C2 H2A 121.2 . . ?

C1 C2 H2A 121.2 . . ?

O1 C3 C2 124.49(19) . . ?

O1 C3 C4 113.87(19) . . ?

C2 C3 C4 121.63(18) . . ?

O2 C4 C5 124.9(2) . . ?

O2 C4 C3 114.72(18) . . ?

C5 C4 C3 120.39(19) . . ?

C4 C5 C6 118.71(19) . . ?

C5 C6 C1 120.27(17) . . ?

C5 C6 C7 133.44(18) . . ?

C1 C6 C7 106.28(17) . . ?

C11 C7 C8 120.18(18) . . ?

C11 C7 C6 106.58(17) . . ?

C8 C7 C6 133.23(19) . . ?

C9 C8 C7 118.18(18) . . ?

C9 C8 H8 120.9 . . ?

C7 C8 H8 120.9 . . ?

C8 C9 N2 119.25(18) . . ?

C8 C9 C12 123.84(19) . . ?

N2 C9 C12 116.90(18) . . ?

O3 C10 N2 120.41(18) . . ?

O3 C10 C11 126.44(18) . . ?

N2 C10 C11 113.14(18) . . ?

N1 C11 C7 110.03(17) . . ?

N1 C11 C10 127.49(18) . . ?

C7 C11 C10 122.45(18) . . ?

C17 C12 C13 118.18(19) . . ?

C17 C12 C9 120.03(19) . . ?

C13 C12 C9 121.78(19) . . ?

C14 C13 C12 120.9(2) . . ?

C14 C13 H13 119.6 . . ?

C12 C13 H13 119.6 . . ?

C15 C14 C13 119.9(2) . . ?

C15 C14 H14 120.0 . . ?

C13 C14 H14 120.0 . . ?

C16 C15 C14 120.1(2) . . ?

C16 C15 H15 119.9 . . ?

C14 C15 H15 119.9 . . ?

C15 C16 C17 120.1(2) . . ?

C15 C16 H16 119.9 . . ?

C17 C16 H16 119.9 . . ?

C12 C17 C16 120.8(2) . . ?

C12 C17 H17 119.6 . . ?

C16 C17 H17 119.6 . . ?

O1 C18 H18A 109.5 . . ?

O1 C18 H18B 109.5 . . ?

H18A C18 H18B 109.5 . . ?

O1 C18 H18C 109.5 . . ?

H18A C18 H18C 109.5 . . ?

H18B C18 H18C 109.5 . . ?

O2 C19 H19A 109.5 . . ?

O2 C19 H19B 109.5 . . ?

H19A C19 H19B 109.5 . . ?

O2 C19 H19C 109.5 . . ?

H19A C19 H19C 109.5 . . ?

H19B C19 H19C 109.5 . . ?

O4 C20 H20A 109.5 . . ?

O4 C20 H20B 109.5 . . ?

H20A C20 H20B 109.5 . . ?

O4 C20 H20C 109.5 . . ?

H20A C20 H20C 109.5 . . ?

H20B C20 H20C 109.5 . . ?

|             |  |
|-------------|--|
| _geom_angle |  |
|-------------|--|
